# Supplementary material for: Microscale separation of immiscible liquids using a porous capillary
Source: Royal Society of Chemistry journal article supplement (doi:10.1039/c3ay41251b), 2013-01-01
Supplement: c3ay41251b.pdf [file c3ay41251b.pdf]

## ELECTRONIC SUPPLEMENTARY INFORMATION

### Microscale separation of immiscible liquids using a porous capillary

James H. Bannock, Thomas W. Phillips, Adrian M. Nightingale and John C. deMello\*

Centre for Plastic Electronics, Department of Chemistry, Imperial College London, Exhibition Road

South Kensington, London, SW7 2AZ.

\* j.demello@imperial.ac.uk

#### Tabulated data for Figures 3a and 3b

For each set of flow rates, measurements were repeated three times in sequence. Eluent was collected from the separator into pre-weighed vials for five minutes (unless otherwise stated) and then reweighed to determine the mass of eluent. Measured masses were accurate to  $\pm 10$  mg. The expected mass of eluent (for 100 % recovery) was determined by multiplying the volumetric injection rate of water by the collection time, taking the density of water to be  $1 \text{ g cm}^{-3}$ . Photographs of the eluent vials from each set of experiments are shown below. No PFPE is visible in any of the images, indicating full depletion of the carrier fluid in all cases.

**Table SI 1** Influence of total flow rate on recovery efficiency at a constant PFPE:Water ratio of 1:1 (see Figure 3a)

| Expt. | $F_{\text{total}}$<br>( $F_{\text{PFPE}}:F_{\text{water}}$ )<br>/ $\mu\text{L min}^{-1}$ | Repeat<br>No. | Mass<br>of Vial<br>/ g | Mass of<br>Vial + Eluent<br>/ g | Mass of<br>Eluent<br>/ g | Expected<br>Mass of<br>Eluent / g | Recovery<br>Efficiency<br>/ % |
|-------|------------------------------------------------------------------------------------------|---------------|------------------------|---------------------------------|--------------------------|-----------------------------------|-------------------------------|
| A     | 1600<br>(800:800)                                                                        | 1             | 6.61                   | 10.60                           | 3.99                     | 4.00                              | 99.8                          |
|       |                                                                                          | 2             | 6.67                   | 10.66                           | 3.99                     |                                   | 99.8                          |
|       |                                                                                          | 3             | 6.44                   | 10.43                           | 3.99                     |                                   | 99.8                          |
| B     | 800<br>(400:400)                                                                         | 1             | 6.62                   | 8.62                            | 2.00                     | 2.00                              | 100                           |
|       |                                                                                          | 2             | 6.62                   | 8.62                            | 2.00                     |                                   | 100                           |
|       |                                                                                          | 3             | 6.37                   | 8.37                            | 2.00                     |                                   | 100                           |
| C     | 400<br>(200:200)                                                                         | 1             | 6.43                   | 7.43                            | 1.00                     | 1.00                              | 100                           |
|       |                                                                                          | 2             | 6.42                   | 7.42                            | 1.00                     |                                   | 100                           |
|       |                                                                                          | 3             | 6.43                   | 7.43                            | 1.00                     |                                   | 100                           |
| D     | 200<br>(100:100)                                                                         | 1             | 6.53                   | 7.03                            | 0.50                     | 0.50                              | 100                           |
|       |                                                                                          | 2             | 6.39                   | 6.89                            | 0.50                     |                                   | 100                           |
|       |                                                                                          | 3             | 6.37                   | 6.87                            | 0.50                     |                                   | 100                           |
| E     | 100<br>(50:50)                                                                           | 1             | 6.37                   | 6.62                            | 0.25                     | 0.25                              | 100                           |
|       |                                                                                          | 2             | 6.58                   | 6.83                            | 0.25                     |                                   | 100                           |
|       |                                                                                          | 3             | 6.60                   | 6.85                            | 0.25                     |                                   | 100                           |

**Table SI 2** Influence of PFPE:water flow ratio on the recovery efficiency at a constant total flow rate of 200  $\mu\text{L min}^{-1}$  (see Figure 3b)

| Expt. Code        | $F_{\text{total}}$<br>( $F_{\text{PFPE}}:F_{\text{water}}$ )<br>/ $\mu\text{L min}^{-1}$ | Repeat # | Vial / g | Vial + Eluent / g | Eluent / g | Expected Mass of Eluent / g | Recovery Efficiency / % |
|-------------------|------------------------------------------------------------------------------------------|----------|----------|-------------------|------------|-----------------------------|-------------------------|
| F                 | 166.7:33.3                                                                               | 1        | 6.39     | 7.22              | 0.83       | 0.83                        | 100                     |
|                   |                                                                                          | 2        | 6.45     | 7.28              | 0.83       |                             | 100                     |
|                   |                                                                                          | 3        | 6.35     | 7.18              | 0.83       |                             | 100                     |
| G                 | 133.3:66.7                                                                               | 1        | 6.37     | 7.04              | 0.67       | 0.67                        | 100                     |
|                   |                                                                                          | 2        | 6.40     | 7.06              | 0.66       |                             | 99                      |
|                   |                                                                                          | 3        | 6.35     | 7.01              | 0.66       |                             | 99                      |
| H                 | 67.7:133.3                                                                               | 1        | 6.39     | 6.72              | 0.33       | 0.33                        | 100                     |
|                   |                                                                                          | 2        | 6.39     | 6.72              | 0.33       |                             | 100                     |
|                   |                                                                                          | 3        | 6.36     | 6.69              | 0.33       |                             | 100                     |
| I*                | 33.3:166.7                                                                               | 1        | 6.38     | 7.04              | 0.66       | 0.67                        | 99                      |
|                   |                                                                                          | 2        | 6.28     | 6.94              | 0.66       |                             | 99                      |
|                   |                                                                                          | 3        | 6.36     | 7.02              | 0.66       |                             | 99                      |
| J*                | 18.2:181.8                                                                               | 1        | 6.39     | 6.75              | 0.36       | 0.36                        | 100                     |
|                   |                                                                                          | 2        | 6.42     | 6.78              | 0.36       |                             | 100                     |
|                   |                                                                                          | 3        | 6.56     | 6.92              | 0.36       |                             | 100                     |
| K<br>(water only) | 0:200                                                                                    | 1        | 6.47     | 7.47              | 1.00       | 1.00                        | 100                     |
|                   |                                                                                          | 2        | 6.44     | 7.44              | 1.00       |                             | 100                     |
|                   |                                                                                          | 3        | 6.57     | 7.57              | 1.00       |                             | 100                     |
| L<br>(PFPE only)  | 200:0                                                                                    | 1        | 6.64     | 6.64              | 0.00       | 0.00                        | n/a                     |
|                   |                                                                                          | 2        | 6.66     | 6.66              | 0.00       |                             | n/a                     |
|                   |                                                                                          | 3        | 6.45     | 6.45              | 0.00       |                             | n/a                     |

\* due to the low volumetric injection rates of water used in these experiments, the collection time was increased to 20 minutes.

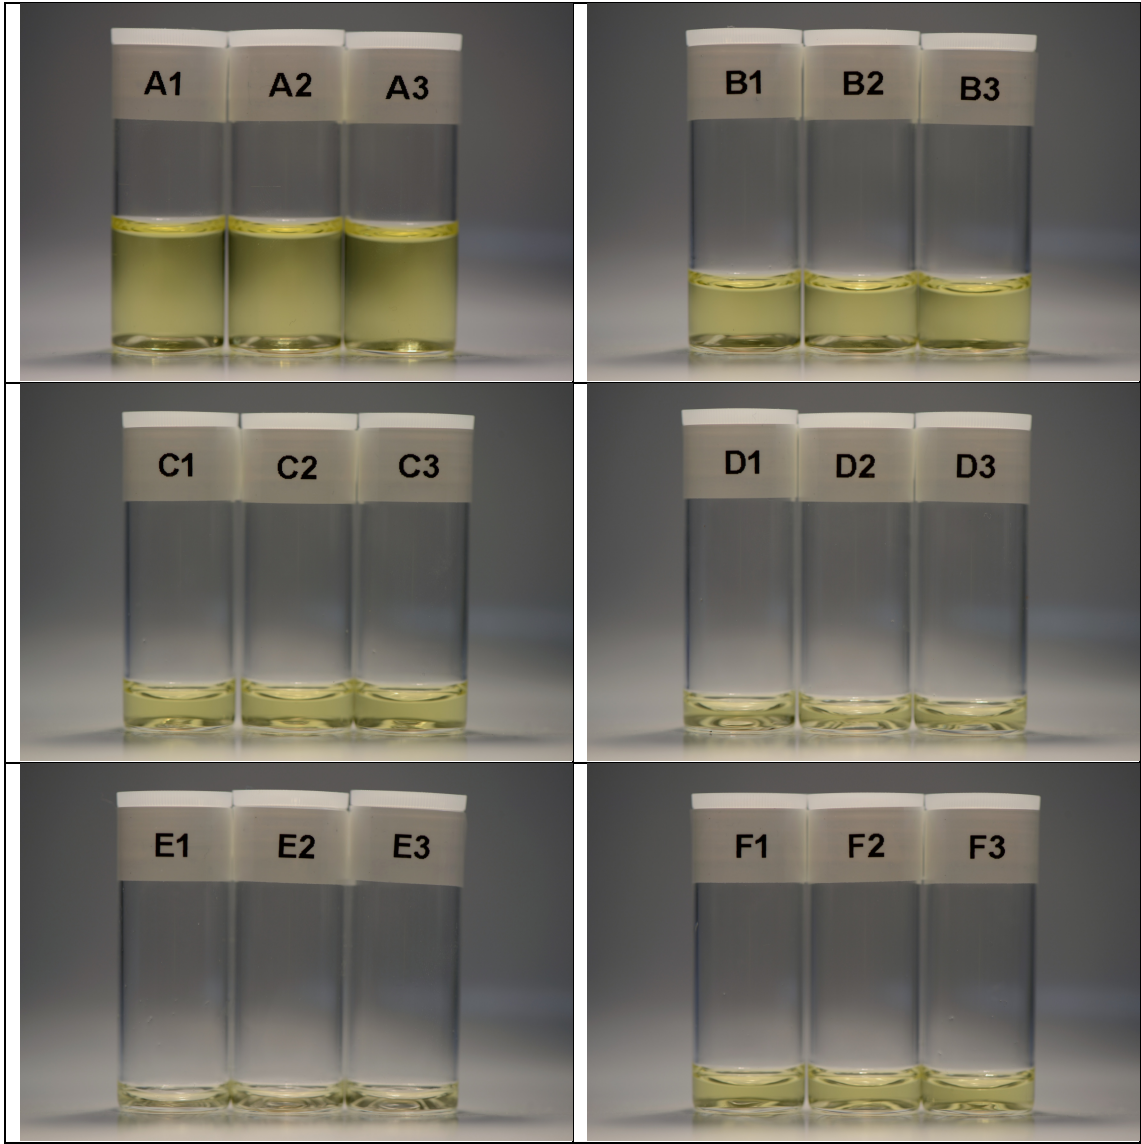

**Fig. S 1** Images of the eluent for experiments A to F

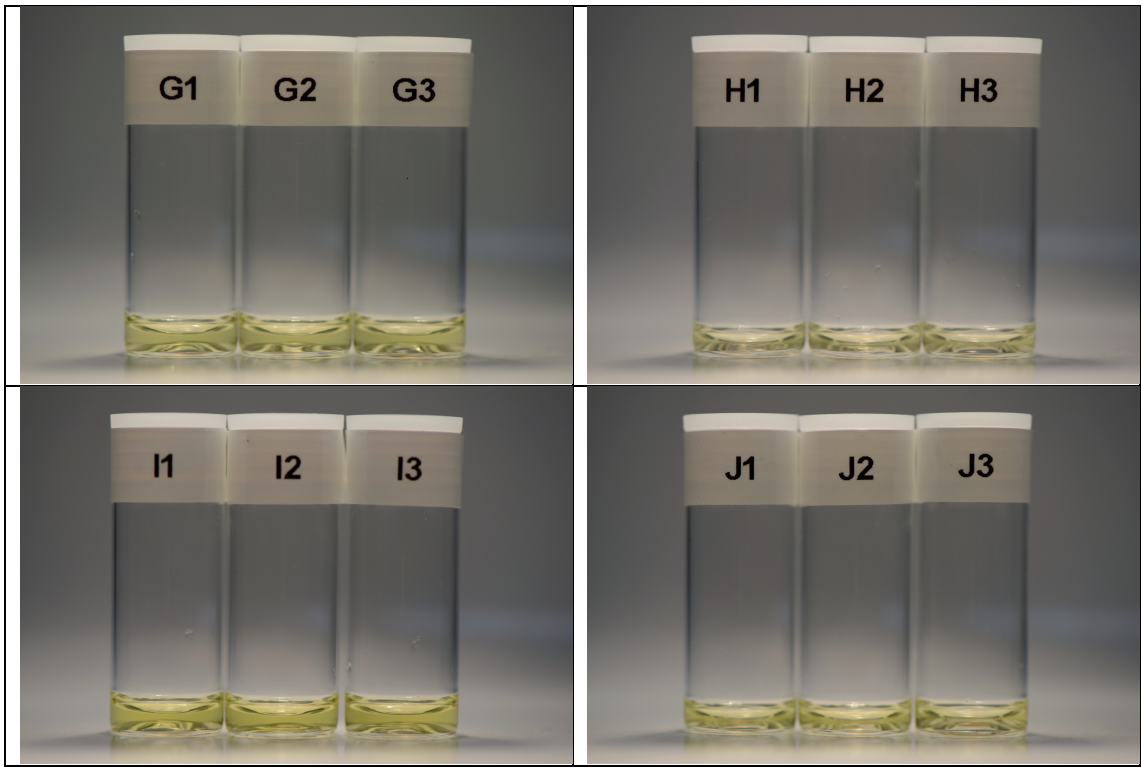

**Fig. S 2** Images of the eluent for experiments G to J
